# Supplementary material for: KINECT 3: A Phase 3 Randomized, Double-Blind, Placebo-Controlled Trial of Valbenazine for Tardive Dyskinesia
Source: Atypon-hosted journal article supplement (doi:10.1176/appi.ajp.2017.16091037), 2017-03-21
Supplement: appi.ajp.2017.16091037.ds001.pdf [file appi.ajp.2017.16091037.ds001.pdf]

 


Psychiatry Online
