# Supplementary material for: KINECT 3: A Phase 3 Randomized, Double-Blind, Placebo-Controlled Trial of Valbenazine for Tardive Dyskinesia
Source: Atypon-hosted journal article supplement (doi:10.1176/appi.ajp.2017.16091037), 2017-03-21
Supplement: appi.ajp.2017.16091037.ds001.pdf [file appi.ajp.2017.16091037.ds001.pdf]

## **Supplementary Methods**

### ***Blinding***

Valbenazine and placebo were identical in appearance and packaging, and subjects were instructed to take the study medication every morning. Placebo was administered as 2 capsules; subjects randomized to valbenazine 40 mg/day received a 40-mg capsule plus matching placebo capsule. Subjects randomized to valbenazine 80 mg/day received 40 mg/day during Week 1 (plus 1 matching placebo capsule) and then 80 mg/day (two 40-mg capsules) at the start of Week 2.

### ***Estimation of sample size***

In the prior KINECT 2 study, the least squares mean difference between treatment groups was 2.4 for the AIMS score change from baseline, with a standard deviation of 4.0 (1). Based on this result, along with an assumed discontinuation rate of 12%, it was estimated that 80 subjects would be needed per treatment group in the current study to detect statistically significant differences between valbenazine and placebo at 0.95 power using a standard two-sample t-test with two-sided Type I error of 0.05.

1. O'Brien CF, Jimenez R, Hauser RA, Factor SA, Burke J, Mandri D, Castro-Gayol JC: NBI-98854, a selective monoamine transport inhibitor for the treatment of tardive dyskinesia: a randomized, double-blind, placebo-controlled study. *Mov Disord* 2015; 30:1681-1687.



**FIGURE S2. Percent Improvement from Baseline in AIMS Total Score**

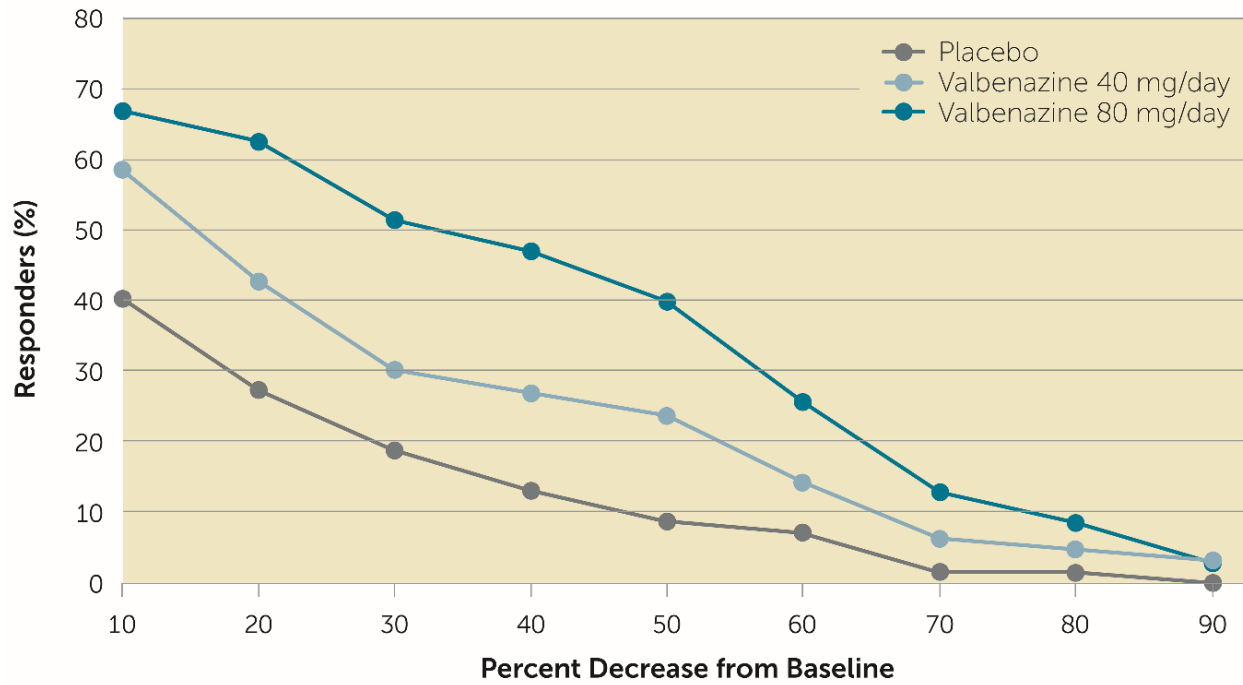

Cumulative proportion of subjects who experienced AIMS improvements (range, 10% to 90% decrease in total score from baseline at Week 6), analyzed descriptively by treatment group.

**FIGURE S3. Distribution of AIMS Total Scores at Baseline**

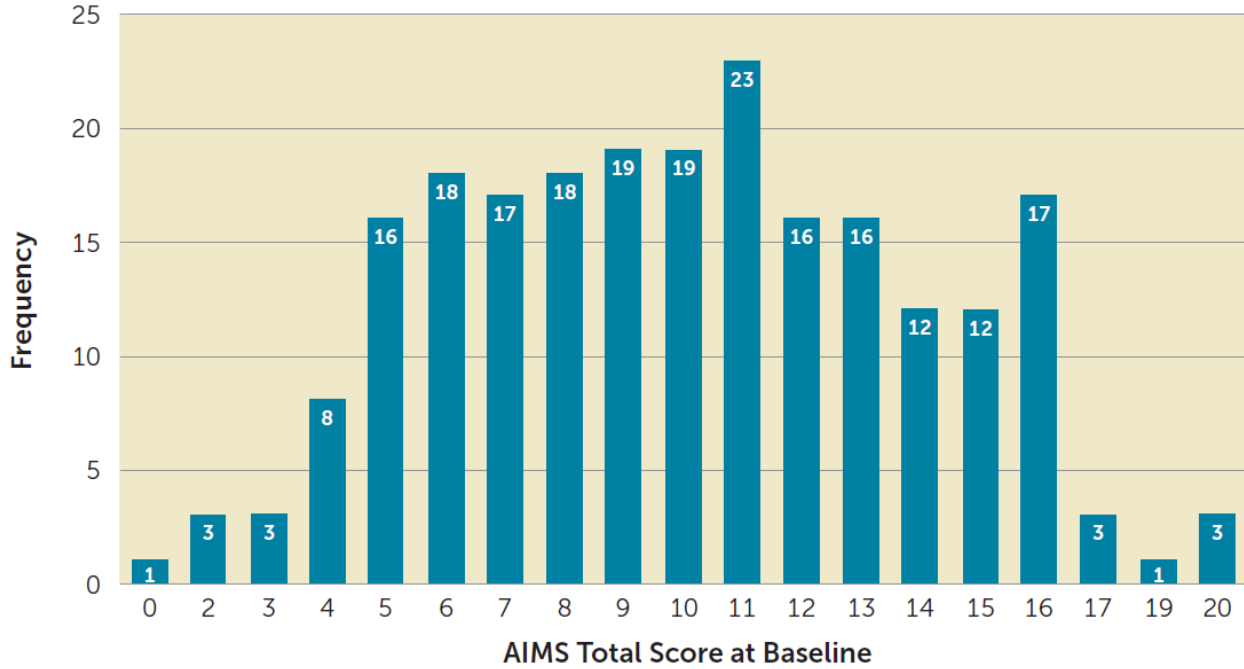

AIMS total scores were based on consensus rating of two blinded central video raters. The total score represents the sum of scores from 7 individual AIMS items, with possible ratings ranging from 0 (none) to 4 (severe). The AIMS total score is not a linear scale, and each total score can represent a range of clinical presentations. For example, an AIMS total score=4 may represent a subject who had a score=1 (minimal) on 4 different AIMS items or a score=4 (severe) on just 1 item.

AIMS, Abnormal Involuntary Movement Scale.

**TABLE S1. Study Endpoints**

| <b>Endpoint Classification</b> | <b>Efficacy Endpoint</b>                                                |
|--------------------------------|-------------------------------------------------------------------------|
| Primary                        | AIMS total score mean change from baseline at Week 6                    |
| Key Secondary                  | CGI-TD mean score at Week 6                                             |
| Secondary                      | Percentage of subjects classified as AIMS responders at Week 6          |
|                                | Percentage of subjects classified as CGI-TD responders at Week 6        |
|                                | PGIC mean score at Week 6                                               |
|                                | Percentage of subjects classified as PGIC responders at Week 6          |
|                                | TDIS total score mean change from baseline at Week 6                    |
| Exploratory                    | AIMS total score mean change from baseline at Weeks 2 and 4             |
|                                | CGI-TD mean score at Weeks 2 and 4                                      |
|                                | Percentage of subjects classified as AIMS responders at Weeks 2 and 4   |
|                                | Percentage of subjects classified as CGI-TD responders at Weeks 2 and 4 |
|                                | PGIC mean score at Weeks 2 and 4                                        |
|                                | Percentage of subjects classified as PGIC responders at Weeks 2 and 4   |
|                                | TDIS total score mean change from baseline at Weeks 2 and 4             |

AIMS, Abnormal Involuntary Movement Scale; CGI-TD, Clinical Global Impression of Change-Tardive Dyskinesia; PGIC, Patient Global Impression of Change; TDIS, Tardive Dyskinesia Impact Scale.

**TABLE S2. Psychiatric Status Rating Scale Scores (Safety Population)**

| Psychiatric scale                             | At Baseline |                    |                          |                    |                          |                    | At Week 6 |                    |                          |                    |                          |                    |
|-----------------------------------------------|-------------|--------------------|--------------------------|--------------------|--------------------------|--------------------|-----------|--------------------|--------------------------|--------------------|--------------------------|--------------------|
|                                               | Placebo     |                    | Valbenazine<br>40 mg/day |                    | Valbenazine<br>80 mg/day |                    | Placebo   |                    | Valbenazine<br>40 mg/day |                    | Valbenazine<br>80 mg/day |                    |
|                                               | n           | Mean Score<br>(SD) | n                        | Mean Score<br>(SD) | n                        | Mean Score<br>(SD) | n         | Mean Score<br>(SD) | n                        | Mean Score<br>(SD) | n                        | Mean Score<br>(SD) |
| PANSS<br>Negative Symptoms                    | 50          | 15.4 (4.5)         | 48                       | 14.9 (4.7)         | 52                       | 14.3 (3.9)         | 43        | 15.0 (4.7)         | 42                       | 15.1 (4.6)         | 44                       | 15.2 (4.8)         |
| PANSS<br>Positive Symptoms                    | 50          | 12.9 (3.3)         | 48                       | 12.8 (3.7)         | 52                       | 13.0 (4.2)         | 43        | 12.7 (4.1)         | 42                       | 12.0 (3.6)         | 44                       | 12.8 (4.0)         |
| PANSS<br>General Psychopathology              | 50          | 27.5 (5.3)         | 48                       | 27.2 (6.5)         | 52                       | 26.8 (5.5)         | 43        | 26.6 (6.3)         | 42                       | 25.9 (5.5)         | 44                       | 26.2 (6.0)         |
| Calgary Depression Scale<br>for Schizophrenia | 50          | 2.0 (2.2)          | 48                       | 2.0 (2.1)          | 52                       | 1.9 (2.2)          | 43        | 1.9 (2.4)          | 42                       | 1.4 (2.4)          | 44                       | 1.6 (2.1)          |
| Montgomery-Åsberg<br>Depression Rating Scale  | 26          | 5.2 (2.9)          | 24                       | 7.1 (3.8)          | 27                       | 5.4 (4.0)          | 26        | 6.5 (6.4)          | 21                       | 6.9 (4.7)          | 26                       | 3.9 (4.1)          |
| Young Mania Rating Scale                      | 26          | 1.8 (2.3)          | 24                       | 3.0 (3.0)          | 27                       | 3.3 (3.2)          | 26        | 2.3 (3.3)          | 21                       | 2.6 (2.6)          | 26                       | 2.0 (2.2)          |

PANSS, Positive and Negative Syndrome Scale; SD, standard deviation.
